# Supplementary material for: PTD4 Peptide Increases Neural Viability in an In Vitro Model of Acute Ischemic Stroke
Source: MDPI journal article supplement (doi:10.3390/ijms22116086), 2021-06-04
Supplement: s1 [file s1]

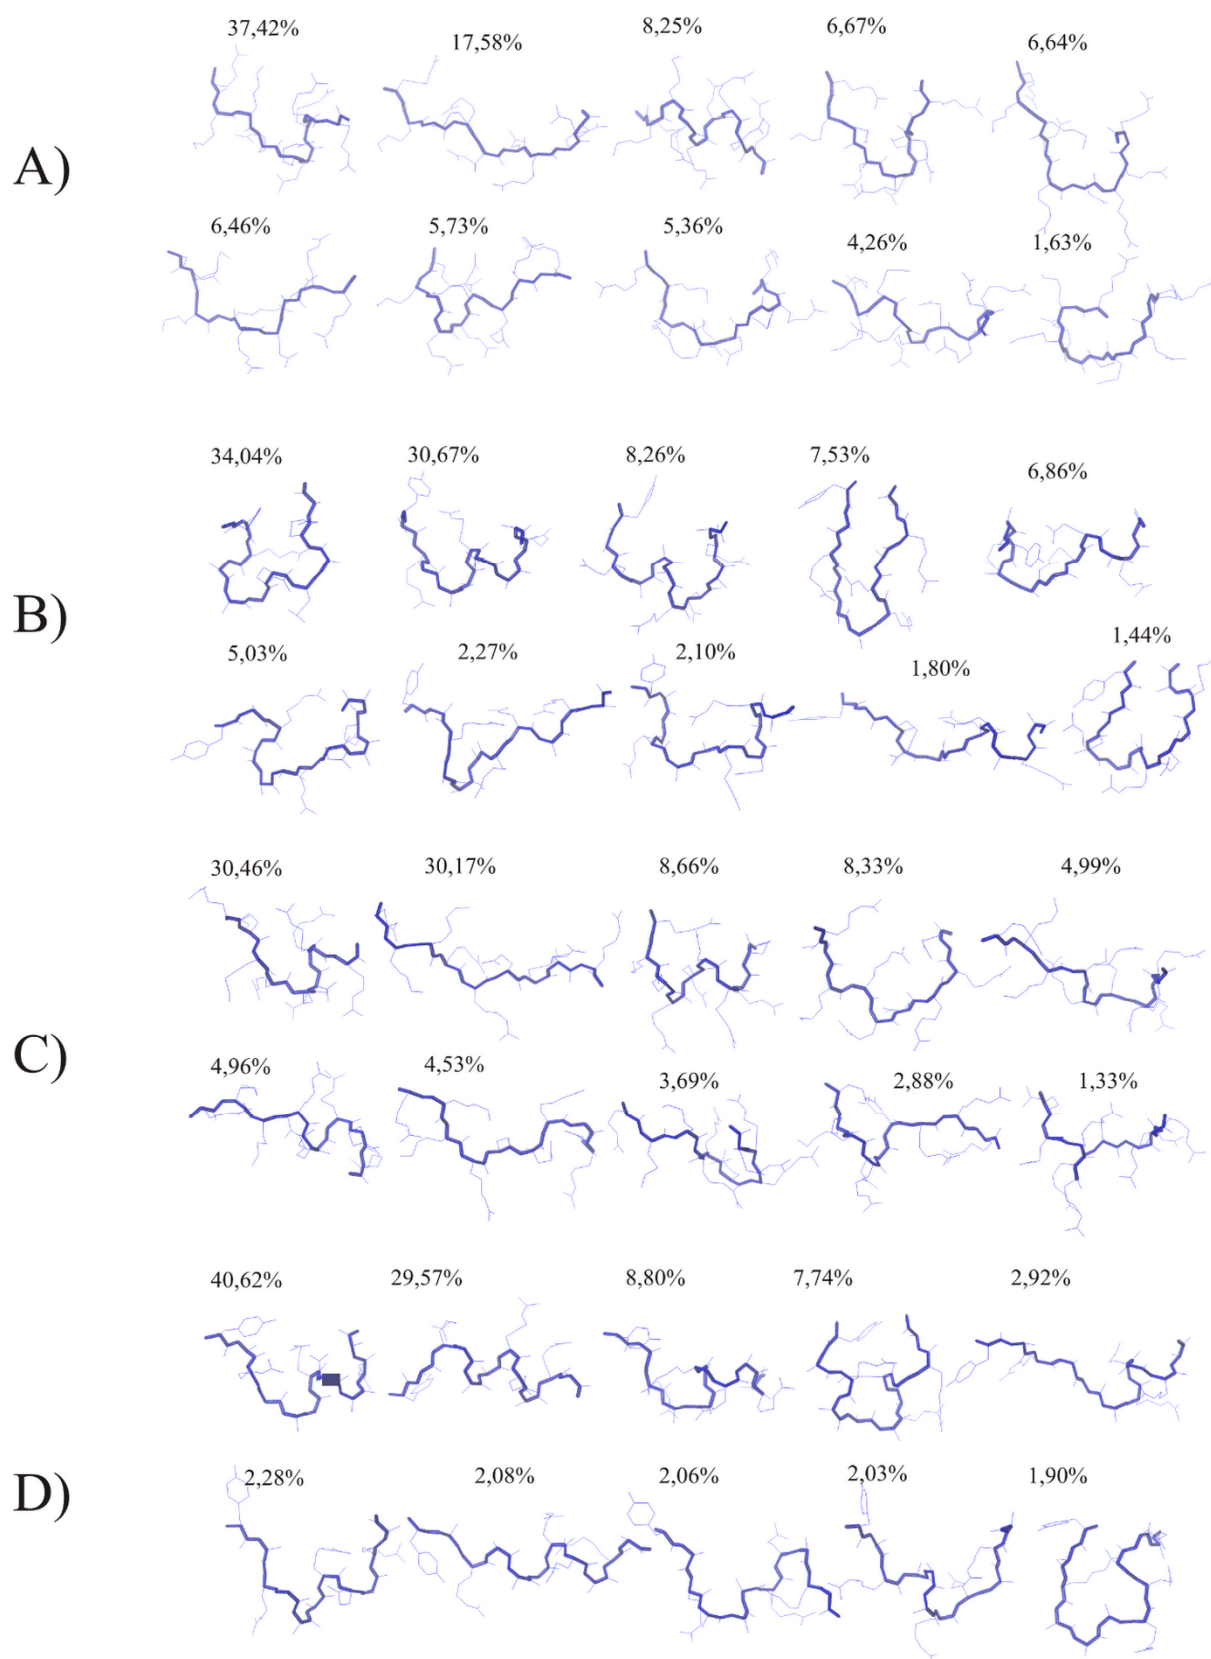

**Figure S1.** Ten clusters of 3D structures of **(A)** Tat(49-57)-NH<sub>2</sub> and **(B)** PTD4 peptides in water and of **(C)** Tat(49-57)-NH<sub>2</sub> and **(D)** PTD4 peptides 30 % (v/v) TFE, respectively. Each cluster is represented by one structure. All structural models were generated using the AMBER program.
